# Supplementary material for: SRD5A3-CDG: Emerging Phenotypic Features of an Ultrarare CDG Subtype
Source: PubMed Central journal article supplement (PMC8671882; doi:10.3389/fgene.2021.737094), 2021-12-01

**Figure 1: Frequency of symptoms affecting our SRD5A3-CDG cohort**

This bar chart demonstrates the number of patients affected by each clinical feature / organ involvement.

Learning difficulties (11/11), ophthalmological signs (11/11), hypotonia (10/11), speech delay (9/11), motor delay (9/11), cutaneous (7/11), scoliosis (6/11), anxiety (5/11), ataxia (5/11), gastrointestinal (5/11), cardiac (4/11), endocrine (4/11), autistic features (3/11), joint laxity (3/11), dystonia (2/11), dysmorphism (2/11), renal (1/11)

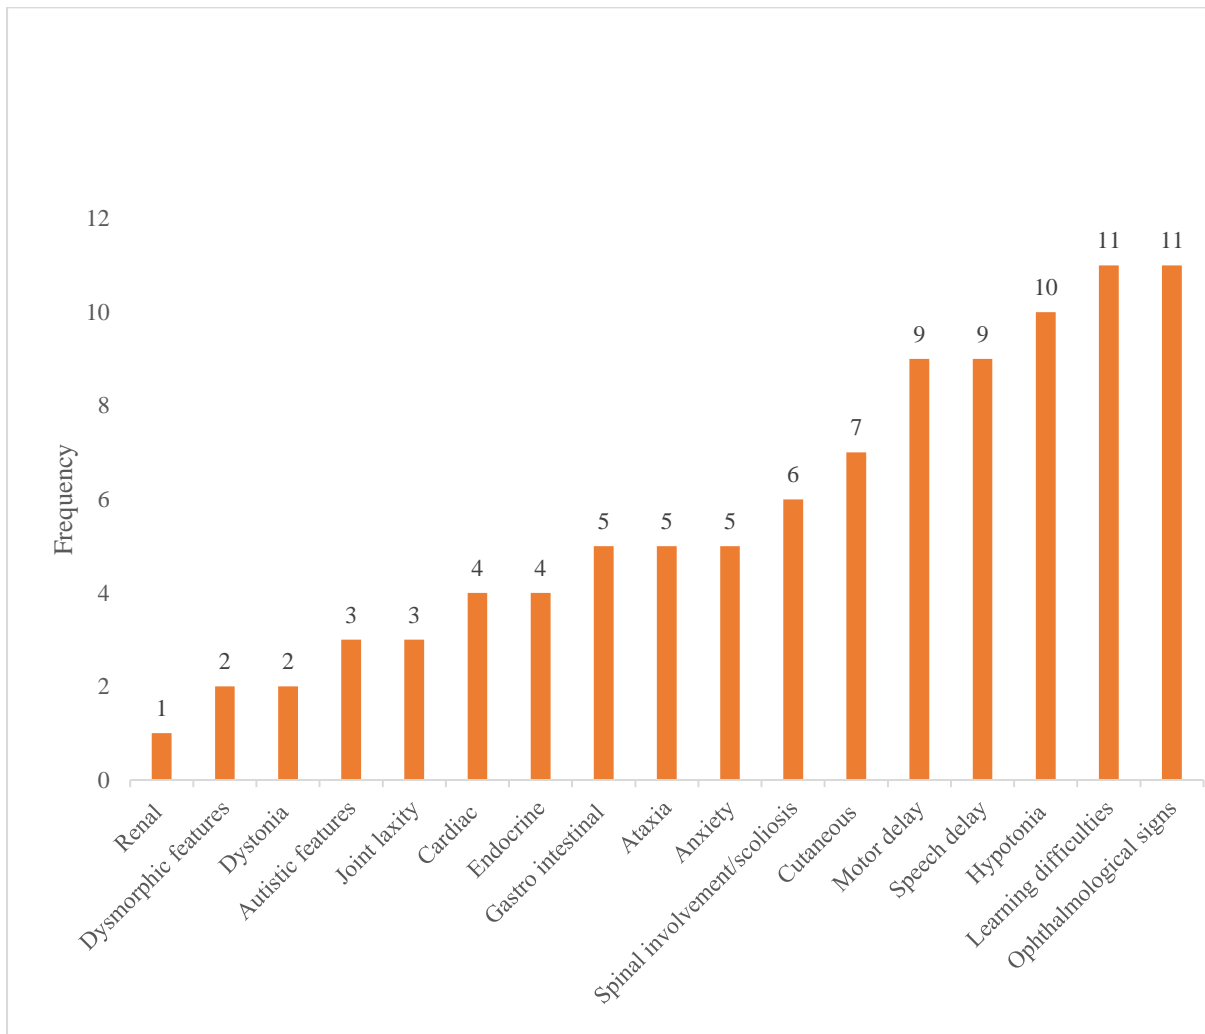

Supplement: DataSheet1.pdf [file DataSheet1.pdf]
