# Supplementary material for: SRD5A3-CDG: Emerging Phenotypic Features of an Ultrarare CDG Subtype
Source: PubMed Central journal article supplement (PMC8671882; doi:10.3389/fgene.2021.737094), 2021-12-01

**Figure 4: Examples of skin changes seen in SRD5A3-CDG.** (A) Well demarcated erythematous, scaly plaque classical of psoriasis seen in patient 1-1. (B) Excessively dry scaly skin representative of ichthyosis seen in patient 1-2 who was born as a collodion baby.

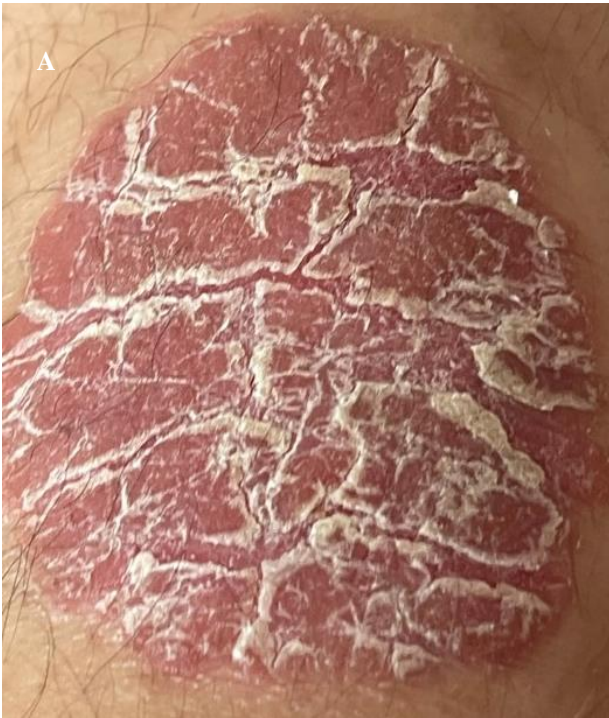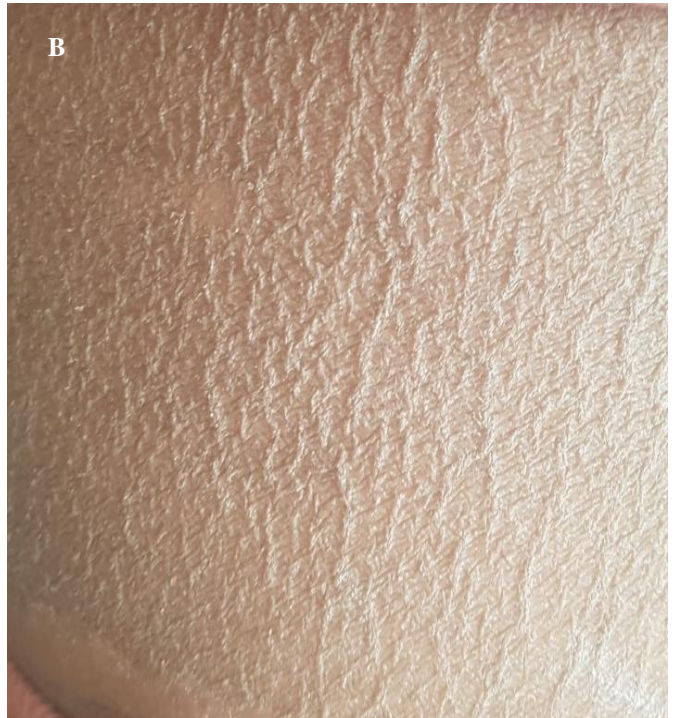

Supplement: DataSheet4.pdf [file DataSheet4.pdf]
